# Supplementary material for: Empirical Bayes Analysis of Quantitative Proteomics Experiments
Source: PubMed Central journal article supplement (PMC2759080; doi:10.1371/journal.pone.0007454), 2009-10-14

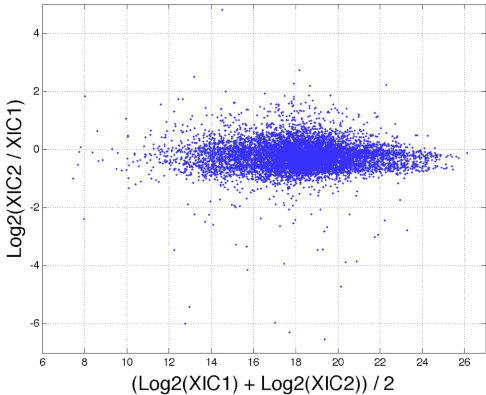

Supplement: pone.0007454.s002.pdf [file pone.0007454.s002.pdf]
