# Supplementary material for: Empirical Bayes Analysis of Quantitative Proteomics Experiments
Source: PubMed Central journal article supplement (PMC2759080; doi:10.1371/journal.pone.0007454), 2009-10-14

**A**

k252a .25x null distribution

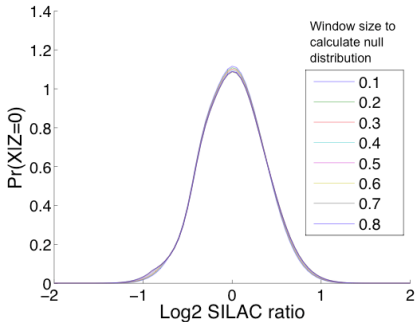**B**

k252a .25x marginal distribution

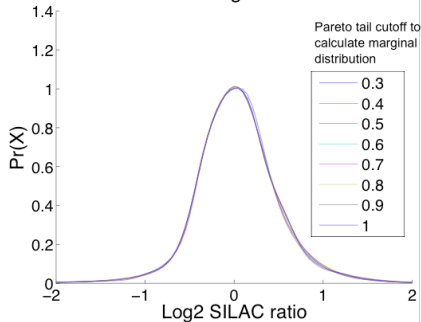**C**

miR-16 null distribution

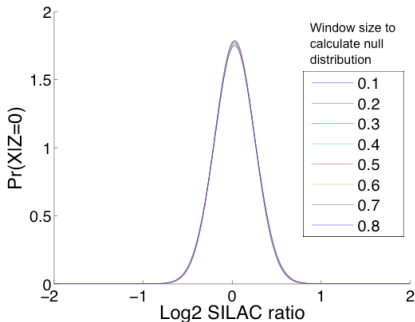**D**

miR-16 marginal distribution

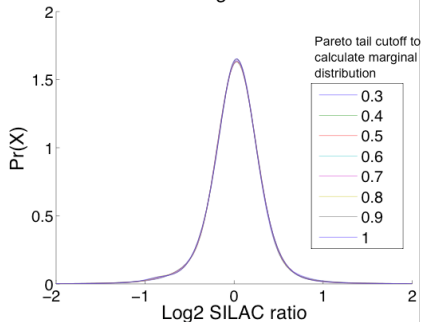

Supplement: pone.0007454.s003.pdf [file pone.0007454.s003.pdf]
