# Supplementary material for: Empirical Bayes Analysis of Quantitative Proteomics Experiments
Source: PubMed Central journal article supplement (PMC2759080; doi:10.1371/journal.pone.0007454), 2009-10-14

# LTQ-Orbitrap data analysis workflow/protocol : SILAC for Target ID

Automated by run-pipeline.pl

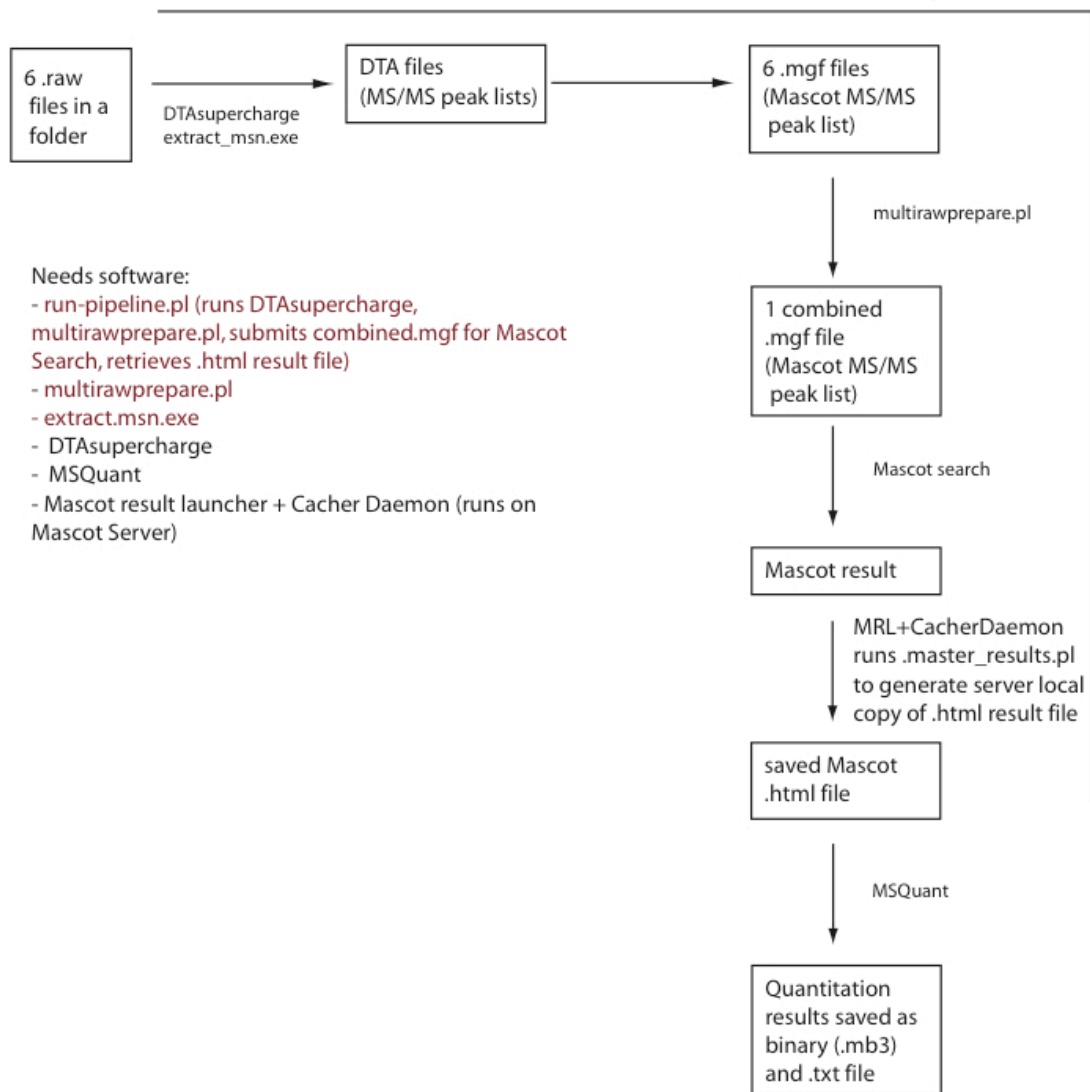

Supplement: pone.0007454.s004.pdf [file pone.0007454.s004.pdf]
