# Supplementary material for: Empirical Bayes Analysis of Quantitative Proteomics Experiments
Source: PubMed Central journal article supplement (PMC2759080; doi:10.1371/journal.pone.0007454), 2009-10-14

## 7-mer (2-8)

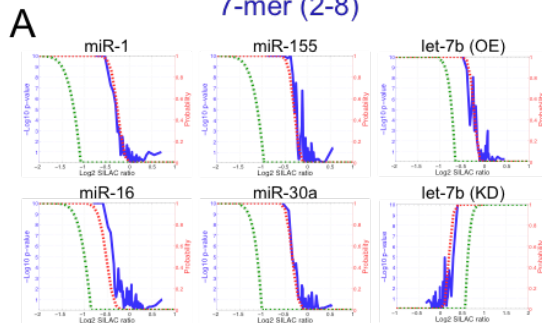

## 7-mer (a2-7)

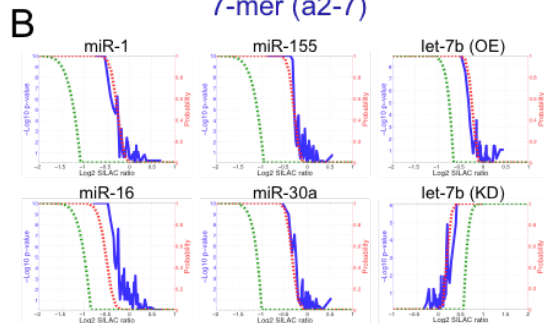

## 8-mer (1-8)

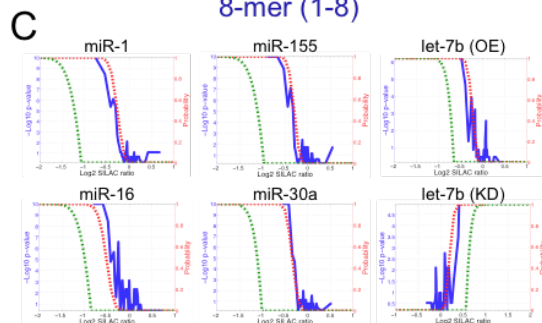

## 6-mer (2-7)

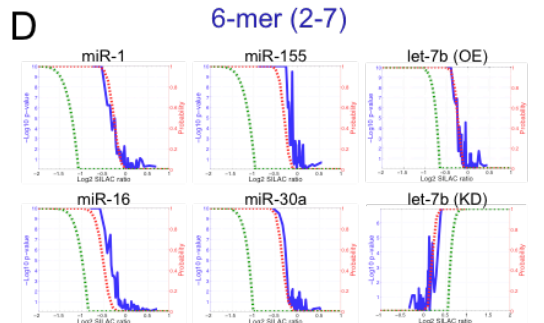

## Target Scan

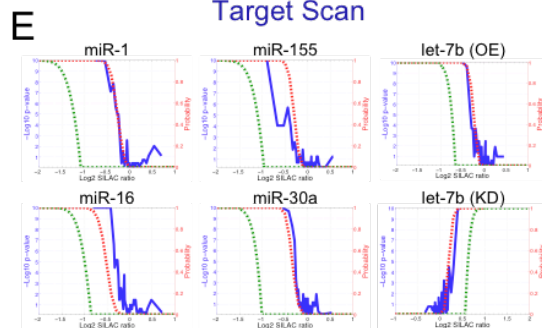7-mer (2-8), bin size 50, background size 1/5<sup>th</sup>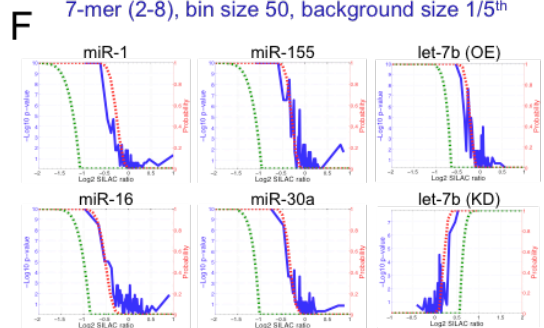

Supplement: pone.0007454.s005.pdf [file pone.0007454.s005.pdf]
