# Supplementary material for: Empirical Bayes Analysis of Quantitative Proteomics Experiments
Source: PLoS One. 2009 Oct 14;4(10):e7454. doi: 10.1371/journal.pone.0007454 (PMC2759080; doi:10.1371/journal.pone.0007454)
Supplement: Table S1 — Small-molecule target identification. This table contains lists of target proteins inferred in each affinity pull-down experiment. The 3 first pages each present the results from 1 of the analysis methods described in our study. For each experiment (listed in the first row), we provide a list of proteins identified as targets, followed by 2 columns of binary numbers listing whether the protein is a known target or a secondary interactor, followed by a “Notes” column annotating any additional evidence suggesting that an unknown target may in fact interact with the tested small-molecule. The fourth page provides a summary of the results of each analysis method, with predictions evaluated with respect to our lists of known targets. (0.07 MB XLS) [file pone.0007454.s006.xls]

## Sheet: EB
Predicted targets empirical Bayes
k252a .025x				k252a .25x				k252a 2.5x				k252a 5x				k252a 10x				SB-202190				AP-1497 0x
GeneName	IsKinase	Secondary interactor	Notes	GeneName	IsKinase	Secondary interactor	Notes	GeneName	IsKinase	Secondary interactor	Notes	GeneName	IsKinase	Secondary interactor	Notes	GeneName	IsKinase	Secondary interactor	Notes	GeneName	IsTarget	Additional evidence	Notes	Gene Name	IsTarget
RHOA	0	0		RIPK2	1	0		CDK2	1	0		MAP2K1	1	0		TBK1	1	0		CHD6;CHD5	0	0	ATP binding	none
RAB10	0	1	Interacts with AURKA	RHOA	0	0	GTP binding	PKN2	1	0		CAMK2D	1	0		CAMK2G	1	0		MAPK14	1	0
GDA	0	0		CDK2	1	0		STK3	1	0		TBK1	1	0		PRKAR1A	1	0		MAPK9	1	0
				STK3	1	0		MAP2K2	1	0		MAP2K2	1	0		MAP2K1	1	0		GSK3B	1	0
				PDPK1	1	0		PDPK1	1	0		STK3	1	0		PKN1	1	0		CSNK1D	1	0
				PRKAG1	1	0		TBK1	1	0		PRKAR1A	1	0		CAMK2D	1	0		RIPK2	1	0
				STK4	1	0		FER	1	0		CAMK2G	1	0		NQO2	0	0	Target of imatinib	TGFBR1	0	1	Target of SB-431542
				RAB10	0	1	Interacts with AURKA	STK4	1	0		PRKACA	1	0		CDK2	1	0		CSNK1A1	0	1	Not tested, but validated other CSNK1s
				ULK3	1	0		PRKAG1	1	0		IRAK4	1	0		STK4	1	0		FAM83G	0	0	Not tested
				STK10	1	0		AURKA	1	0		CDK2	1	0		CDK5	1	0		GAK	1	0
				PRKD3	1	0		PRKD3	1	0		PKN2	1	0		MAPK9	1	0
				MAP2K6	1	0		PRKAA1	1	0		PHKB	1	0		CDC42BPB	1	0
				PKN2	1	0		RPS6KA3	1	0		AURKA	1	0		PRKAA1	1	0
				MAP4K4	1	0		MAP4K4	1	0		RIPK2	1	0		AAK1	1	0
				MAP2K1	1	0		PRKCD	1	0		MAP2K6	1	0		MAP4K4	1	0
								MAPK8	1	0		MAPK8	1	0		STK3	1	0
								RPS6KA1	1	0		MAP4K4	1	0		PHKA2	1	0
								CAMK2D	1	0		PRKAA1	1	0		RPS6KA3	1	0
								GAK	1	0		PRKD3	1	0		PKN2	1	0
								CDK5	1	0		PRKCD	1	0		PRKCA	1	0
								PRKAR1A	1	0		STK4	1	0		MAP2K6	1	0
								RAB10	0	1	Interacts with AURKA	PHKG2	1	0		RIPK2	1	0
								PRKACA	1	0		RPS6KA3	1	0		PDPK1	1	0
								MARK2	1	0		PRKCA	1	0		GSK3A	1	0
								CAMK2G	1	0		FER	1	0		OSGEP	0	0
								CDC42BPB	1	0		CDK5	1	0		ULK3	1	0
								NQO2	0	0	Target of imatinib	NQO2	0	0	Target of imatinib	PHKB	1	0
								ARF1	0	0	GTP binding	CDC42BPB	1	0		PHKG2	1	0
								HPRT1	0	0		PDPK1	1	0		PRKAR2A	1	0
												RPS6KA1	1	0		TPRKB	0	1	Interacts with TP53RK
												AAK1	1	0		TP53RK	1	0
												PRKACB	1	0		MARK2	1	0
												PRKAR2A	1	0		PRKD2	1	0
												OSGEP	0	0		GSK3B	1	0
												CCNB1	0	1	Interacts with CDC2	MAP2K2	1	0
												ULK3	1	0		CDC2	1	0
												MARK2	1	0		FER	1	0
												GSK3A	1	0		MARK3	1	0
												GAK	1	0		CCNB1	0	1	Interacts with CDC2
												TP53RK	1	0		MAPK1	1	0
												TPRKB	0	1	Interacts with TP53RK	CSNK2A2	1	0
												GSK3B	1	0		PRKCI	1	0
												CDC2	1	0		CSNK2A1	1	0
												PRKCI	1	0
												MAPK1	1	0
												IFI16	0	0
Total	0	1			13	1			25	1			41	2			39	2			6	2		0	0
Total direct + indirect		1				14				26				43				41				8			0
Total inferred		3				15				29				46				43				10			0

## Sheet: Blagoev
Predicted targets 1.5 ratio threshold
k252a .025x				k252a .25x				k252a 2.5x				k252a 5x				k252a 10x				SB-202190				AP-1497 0x
GeneName	IsKinase	Secondary interactor	Notes	GeneName	IsKinase	Secondary interactor	Notes	GeneName	IsKinase	Secondary interactor	Notes	GeneName	IsKinase	Secondary interactor	Notes	GeneName	IsKinase	Secondary interactor	Notes	GeneName	IsTarget	Additional evidence	Notes	Gene Name	IsTarget
NHN1	0	0		RIPK2	1	0		CDK2	1	0		MAP2K1	1	0		TBK1	1	0		CHD6;CHD5	0	0		ALG5	0
RHOA	0	0		RHOA	0	0		PKN2	1	0		CAMK2D	1	0		CAMK2G	1	0		MAPK14	1	0		COPG	0
RAB10	0	1	Interacts with AURKA	CDK2	1	0		STK3	1	0		TBK1	1	0		PRKAR1A	1	0		MAPK9	1	0		USP24	0
GDA	0	0		STK3	1	0		MAP2K2	1	0		MAP2K2	1	0		MAP2K1	1	0		GSK3B	1	0		HEATR5A	0
ANLN	0	0		PRKAG1	1	0		PDPK1	1	0		STK3	1	0		PKN1	1	0		CSNK1D	1	0		SRP68	0
LDLR	0	0		STK4	1	0		TBK1	1	0		PRKAR1A	1	0		CAMK2D	1	0		RIPK2	1	0
MSH6	0	0		PDPK1	1	0		FER	1	0		CAMK2G	1	0		CDK2	1	0		TGFBR1	0	1	Target of SB-431542
TXNRD1	0	0		RAB10	0	1	Interacts with AURKA	STK4	1	0		PRKACA	1	0		NQO2	0	0		CSNK1A1	0	1	Not tested, but validated other CSNK1s
HPRT1	0	0		ULK3	1	0		PRKAG1	1	0		IRAK4	1	0		STK4	1	0		FAM83G	0	0
VDAC2	0	0		STK10	1	0		AURKA	1	0		CDK2	1	0		CDK5	1	0		GAK	1	0
ARF1	0	0		PRKD3	1	0		PRKD3	1	0		PKN2	1	0		MAPK9	1	0		TOP2A	0	0
SERPINH1	0	0		MAP2K6	1	0		PRKAA1	1	0		PHKB	1	0		CDC42BPB	1	0		MYH9	0	0
RAB1B	0	0		PKN2	1	0		RPS6KA3	1	0		RIPK2	1	0		PRKAA1	1	0		NOP5/NOP58	0	0
ENO1	0	0		MAP4K4	1	0		MAP4K4	1	0		AURKA	1	0		MAP4K4	1	0		DIAPH1	0	0
SERPINB1	0	0		MAP2K1	1	0		PRKCD	1	0		MAP2K6	1	0		PKN2	1	0		RBM12;CPNE1	0	0
TXN	0	0		SDHA	0	0		RPS6KA1	1	0		PRKAA1	1	0		AAK1	1	0		MAP7	0	0
NME2;NME1	0	0		GDA	0	0		MAPK8	1	0		MAPK8	1	0		PHKA2	1	0		ENAH	0	0
SET	0	0		ANLN	0	0		CAMK2D	1	0		MAP4K4	1	0		RPS6KA3	1	0		MAPKAPK2	0	0	Not found by karaman
PDIA6	0	0		RAB1B	0	0	GTP binding	GAK	1	0		PRKD3	1	0		PRKCA	1	0
CDC2L5	1	0		HPRT1	0	0		CDK5	1	0		PRKCD	1	0		STK3	1	0
PAICS	0	0		TXNRD1	0	0		PRKAR1A	1	0		PHKG2	1	0		MAP2K6	1	0
PRKDC	1	0		AURKA	1	0		RAB10	0	1	Interacts with AURKA	STK4	1	0		RIPK2	1	0
PTGES3	0	0		SERPINB1	0	0		PRKACA	1	0		RPS6KA3	1	0		GSK3A	1	0
HDGF2	0	0		RHOC	0	0		MARK2	1	0		PRKCA	1	0		OSGEP	0	0
AARS	0	0		MSH6	0	0		CAMK2G	1	0		FER	1	0		PDPK1	1	0
BBX	0	0		CDC42	0	0	GTP binding	CDC42BPB	1	0		CDK5	1	0		ULK3	1	0
TRNT1	0	0		ARF1	0	0		NQO2	0	0		NQO2	0	0		PRKAR2A	1	0
CSTB	0	0		LDLR	0	0		ARF1	0	0		CDC42BPB	1	0		TPRKB	0	1	Interacts with TP53RK
PRDX1	0	0		PRKAA1	1	0		HPRT1	0	0		PDPK1	1	0		PHKB	1	0
SERPINB6	0	0		NME2;NME1	0	0		VDAC2	0	0		RPS6KA1	1	0		PHKG2	1	0
MTPN	0	0		SERPINH1	0	0		ENO1	0	0		PRKAR2A	1	0		MINK1	1	0
ANP32E	0	0		NME1	0	0		PTGES3	0	0		AAK1	1	0		TP53RK	1	0
FTO	0	0		VDAC2	0	0		TXN	0	0		OSGEP	0	0		PRKD2	1	0
SEC61B	0	0		MAP2K2	1	0		CIT	1	0		CCNB1	0	1	Interacts with CDC2	MARK2	1	0
RTCD1	0	0		PTGES3	0	0		POLR3A	0	0		MARK2	1	0		IRAK4	1	0
LSG1	0	0		TXN	0	0		ANP32E	0	0		PRKACB	1	0		GSK3B	1	0
TNPO3	0	0		PAICS	0	0		CSTB	0	0		GSK3A	1	0		MAP2K2	1	0
				MTPN	0	0		CFL1	0	0		ULK3	1	0		FER	1	0
				FER	1	0		BBX	0	0		GAK	1	0		CDC2	1	0
				ENO1	0	0		AARS	0	0		TP53RK	1	0		CCNB1	0	1	Interacts with CDC2
				PRDX2	0	0		TUBB2A	0	0		TPRKB	0	1	Interacts with TP53RK	MARK3	1	0
				IPO11	0	0		PRKDC	1	0		GSK3B	1	0		MAPK1	1	0
				RPS6KA3	1	0		GSR	0	0		CDC2	1	0		CSNK2A2	1	0
				GSR	0	0		MCM7	0	0		PRKCI	1	0		PRKCI	1	0
				PRDX1	0	0						USP7	0	0		NOB1	0	0
				ASNS	0	0										RBM4	0	0
				PLS3	0	0
				TBK1	1	0
				PARK7	0	0
				PRKDC	1	0
				ACTA1	0	0
				CSTB	0	0
				SERPINB6	0	0
				GCLC	0	0
				AARS	0	0
				TRNT1	0	0
				RAN	0	0
				GARS	0	0
				CFL1	0	0
				GEMIN5	0	0
				PRKCD	1	0
				ANP32E	0	0
				CPS1	0	0
				GAK	1	0
				RNPEP	0	0
				TNPO1	0	0
				IGHMBP2	0	0
				ANXA2	0	0
				CBS	0	0
				UBE1	0	0
				XPOT	0	0
				MCM5	0	0
				HNRPUL2	0	0
Total	2	1			22	1			27	1			40	2			40	2			6	2		0	0
Total direct + indirect		3				23				28				42				42				8			0
Total inferred		37				73				44				45				46				18			5

## Sheet: Normal
Predicted targets Gaussian error model
k252a .025x				k252a .25x				k252a 2.5x				k252a 5x				k252a 10x				SB-202190				AP-1497 0x
GeneName	IsKinase	Secondary interactor	Notes	GeneName	IsKinase	Secondary interactor	Notes	GeneName	IsKinase	Secondary interactor	Notes	GeneName	IsKinase	Secondary interactor	Notes	GeneName	IsKinase	Secondary interactor	Notes	GeneName	IsTarget	Additional evidence	notes	Gene Name	IsTarget
none				RIPK2	1	0		CDK2	1	0		MAP2K1	1	0		TBK1	1	0		NONE
								PKN2	1	0		CAMK2D	1	0		CAMK2G	1	0
												TBK1	1	0		PRKAR1A	1	0
												STK3	1	0
												PRKAR1A	1	0
																								AARS2
																								ACO2
																								CAB39L
Total	0	0			1	0			2	0			5	0			3	0			0	0		0	0
Total direct + indirect		0				1				2				5				3				0			0
Total inferred		0				1				2				5				3				0			0

## Sheet: Comparison
			Emp Bayes										1.5 threshold							Gaussian
	Total proteins passing criteria	Total known targets passing criteria	Pr(Z=1) rep1	Pr(Z=1) rep2	power	Total Inferred	Known targets inferred	Known targets + secondary interactors	Precision (with secondary)	Precision (no secondary)	Recall	Total Errors	Total Inferred	Known targets inferred	Known targets + secondary interactors	Precision (with secondary)	Precision (no secondary)	Recall	Total Errors	Total Inferred	Known targets inferred	Known targets + secondary interactors	Precision (with secondary)	Precision (no secondary)	Recall	Total Errors
k252a .025x	584	42	0.15473	0.028252	0.456572	3	0	1	0.333333	0	0	45	37	2	3	0.0810811	0.0540541	0.047619	75	0	0	0	N/A	N/A	0	42
k252a .25x	697	55	0.0534801	0.0664485	0.70742	15	13	14	0.933333	0.866667	0.236364	44	73	22	23	0.315068	0.30137	0.4	84	1	1	1	1	1	0.0181818	54
k252a 2.5x	530	36	0.114924	0.138569	0.88761	29	25	26	0.896552	0.862069	0.694444	15	44	27	28	0.636364	0.613636	0.75	26	2	2	2	1	1	0.0555556	34
k252a 5x	637	47	0.146122	0.138991	0.999312	46	41	43	0.934783	0.891304	0.87234	11	45	40	42	0.933333	0.888889	0.851064	12	5	5	5	1	1	0.106383	42
k252a 10x	540	43	0.125537	0.121066	0.999142	43	39	41	0.953488	0.906977	0.906977	8	46	40	42	0.913043	0.869565	0.930233	9	3	3	3	1	1	0.0697674	40
SB 10x/100x	276	6	0.0713653	0.0391318	0.999657	10	6	8	0.8	0.6	1	4	18	6	8	0.444444	0.333333	1	12	0	0	0	N/A	N/A	0	6
AP-1497 0x	514	0	0.0216113	0.0165392	N/A	0	0	0	N/A	N/A	N/A	0	5	0	0	N/A	N/A	N/A	5	0	0	0	N/A	N/A	N/A	0
