# Supplementary material for: Empirical Bayes Analysis of Quantitative Proteomics Experiments
Source: PLoS One. 2009 Oct 14;4(10):e7454. doi: 10.1371/journal.pone.0007454 (PMC2759080; doi:10.1371/journal.pone.0007454)
Supplement: Table S2 — microRNA statistics. This table contains a statistical description of each microRNA experiment, based on the empirical Bayes model. A description of each data column is included in the table. (0.04 MB XLS) [file pone.0007454.s007.xls]

## Sheet: Sheet1
microRNA	total proteins	power	power (down reg)	pct down	pct up	pct up or down	Total down	Total up	Total reg	Total < -log2(1.5)	Total < -.1	Percent identified < -log2(1.5)	Percent identified < -.1
let-7b OE	3222	0.680719	0.704812	0.108037	0.0655366	0.173573	348.096	211.159	559.251	22	879	0.063201	2.52517
miR-1	3081	0.699918	0.695116	0.126762	0.0443092	0.171071	390.554	136.517	527.07	89	791	0.227881	2.02533
miR-155	3304	0.721357	0.765271	0.11785	0.0634611	0.181311	389.378	209.675	599.052	129	993	0.331298	2.55022
miR-16	3202	0.644478	0.695104	0.0490943	0.040288	0.0893821	157.2	129.002	286.201	101	999	0.642494	6.35496
miR-30	3107	0.678868	0.63808	0.0669562	0.0354514	0.102407	208.033	110.148	318.178	45	761	0.216312	3.65807
let-7b KD	3307	0.671064	0.659551	0.0516601	0.0964672	0.148127	170.84	319.017	489.857	22	665	0.0689618	2.08453
Column descriptions
microRNA	Name of transfected microRNA -- OE and KD refer to let-7b over-expression and knockdown, respectively.
total proteins	Number of proteins detected in each experiment
power	Statistical power, 2-tailed
power (down reg)	Statistical power to detect only down-regulated proteins (up-regulated for let-7b knockdown)
pct down	Percent of proteins predicted to be down-regulated
pct up	Percent of proteins predicted to be up-regulated
pct up or down	Percent of proteins predicted to be up- or down- regulated
Total down	Pct down * total proteins
Total up	Pct up * total proteins
Total reg	Pct up or down * total proteins
Total < -log2(1.5)	Number of proteins with log2 ratio values less than -log2(1.5) (greater than for let-7b knockdown)
Total < -.1	Number of proteins with log2 ratio values less than -.1 (greater than for let-7b knockdown)
Percent identified < -log2(1.5)	[Total < -log2(1.5)] / [number of proteins predcited by our model to be down-regulated (up-regualted for knockdown)]
Percent identified < -.1	[Total < -.1] / [number of proteins predcited by our model to be down-regulated (up-regualted for knockdown)]
